# Supplementary material for: Bacterial Inoculant and Sucrose Amendments Improve the Growth of Rheum palmatum L. by Reprograming Its Metabolite Composition and Altering Its Soil Microbial Community
Source: MDPI journal article supplement (doi:10.3390/ijms23031694), 2022-02-01
Supplement: s1 [file s1]

## Supplementary Material

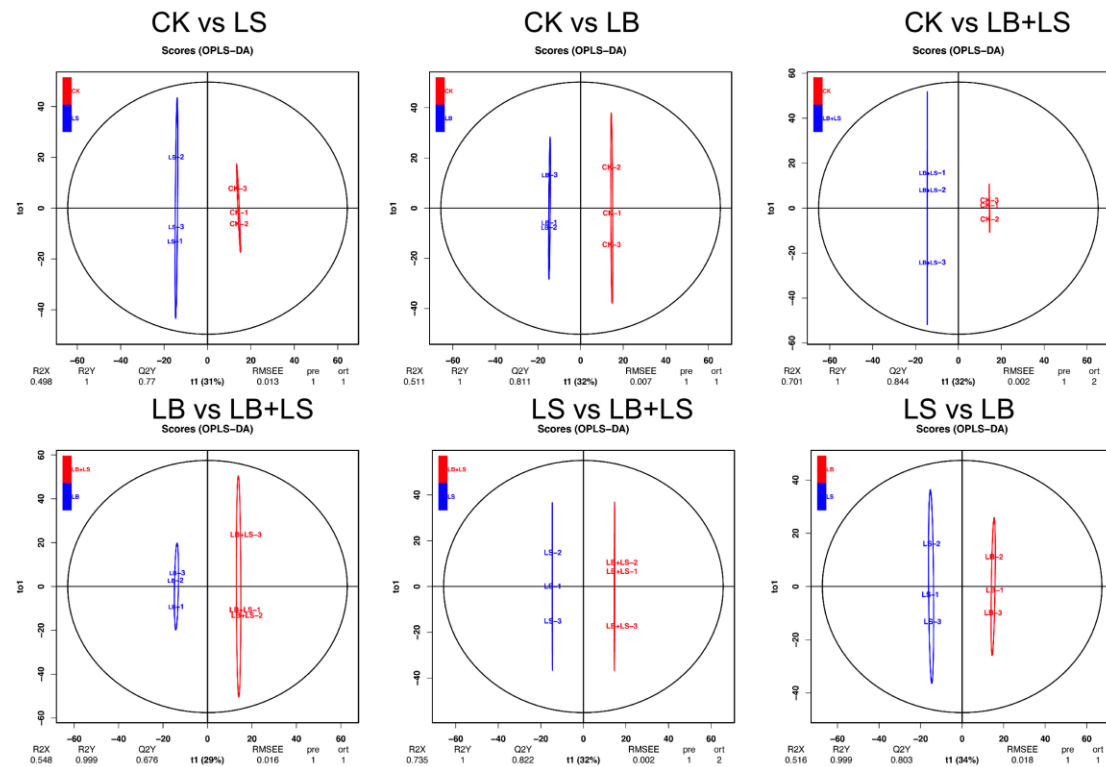

**Figure S1.** Orthogonal partial least squares-discriminant analysis (OPLS-DA) of metabolic profiles in each comparison.

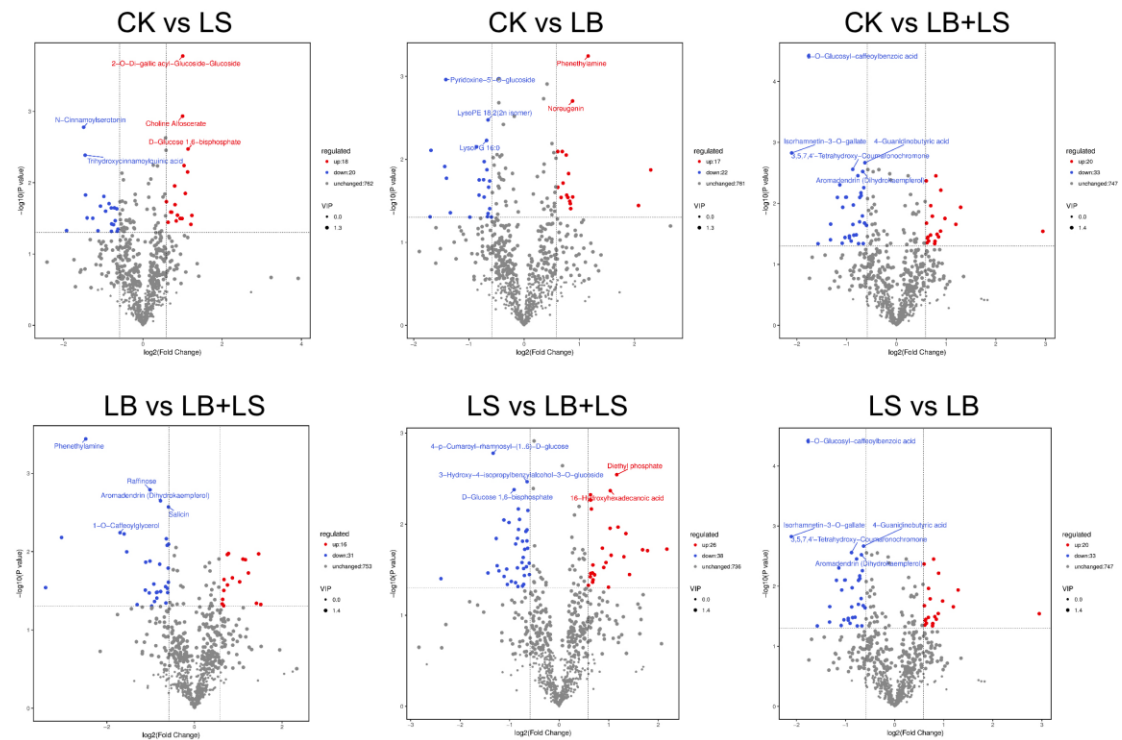

**Figure S2.** Volcano plots of differentially expressed metabolites (DEMs) identified in each comparison.

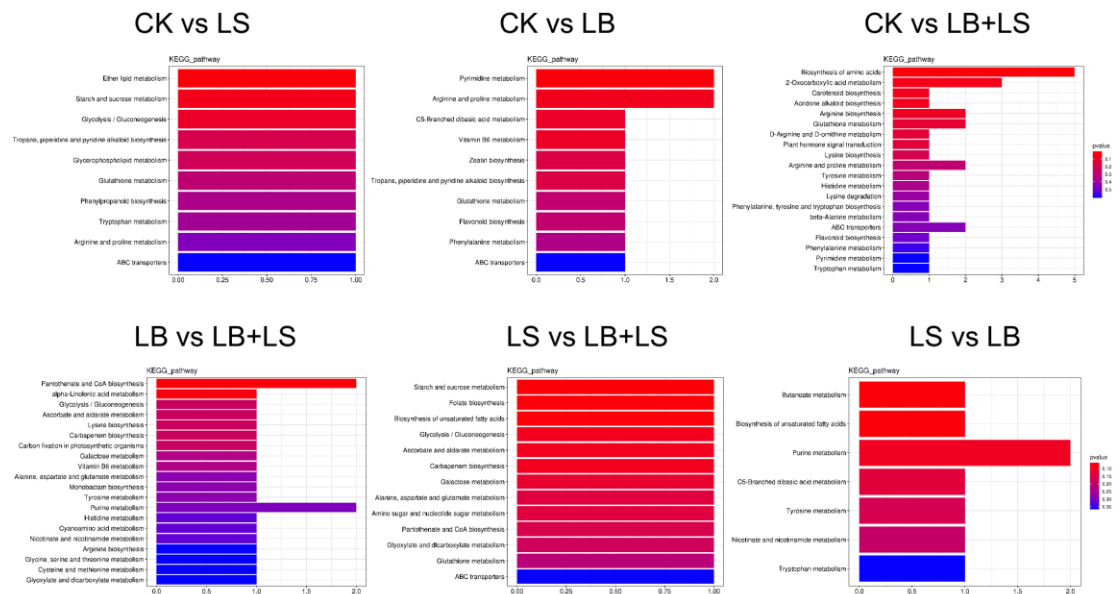

**Figure S3.** KEGG pathway enrichment analysis of *R. palmatum* in each comparison.

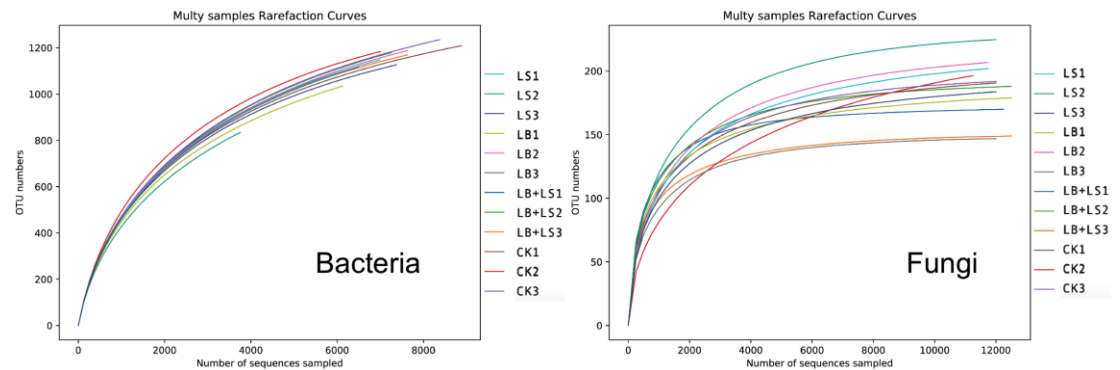

**Figure S4** Rarefaction curves of the *R. palmatum* rhizosphere microbial communities.



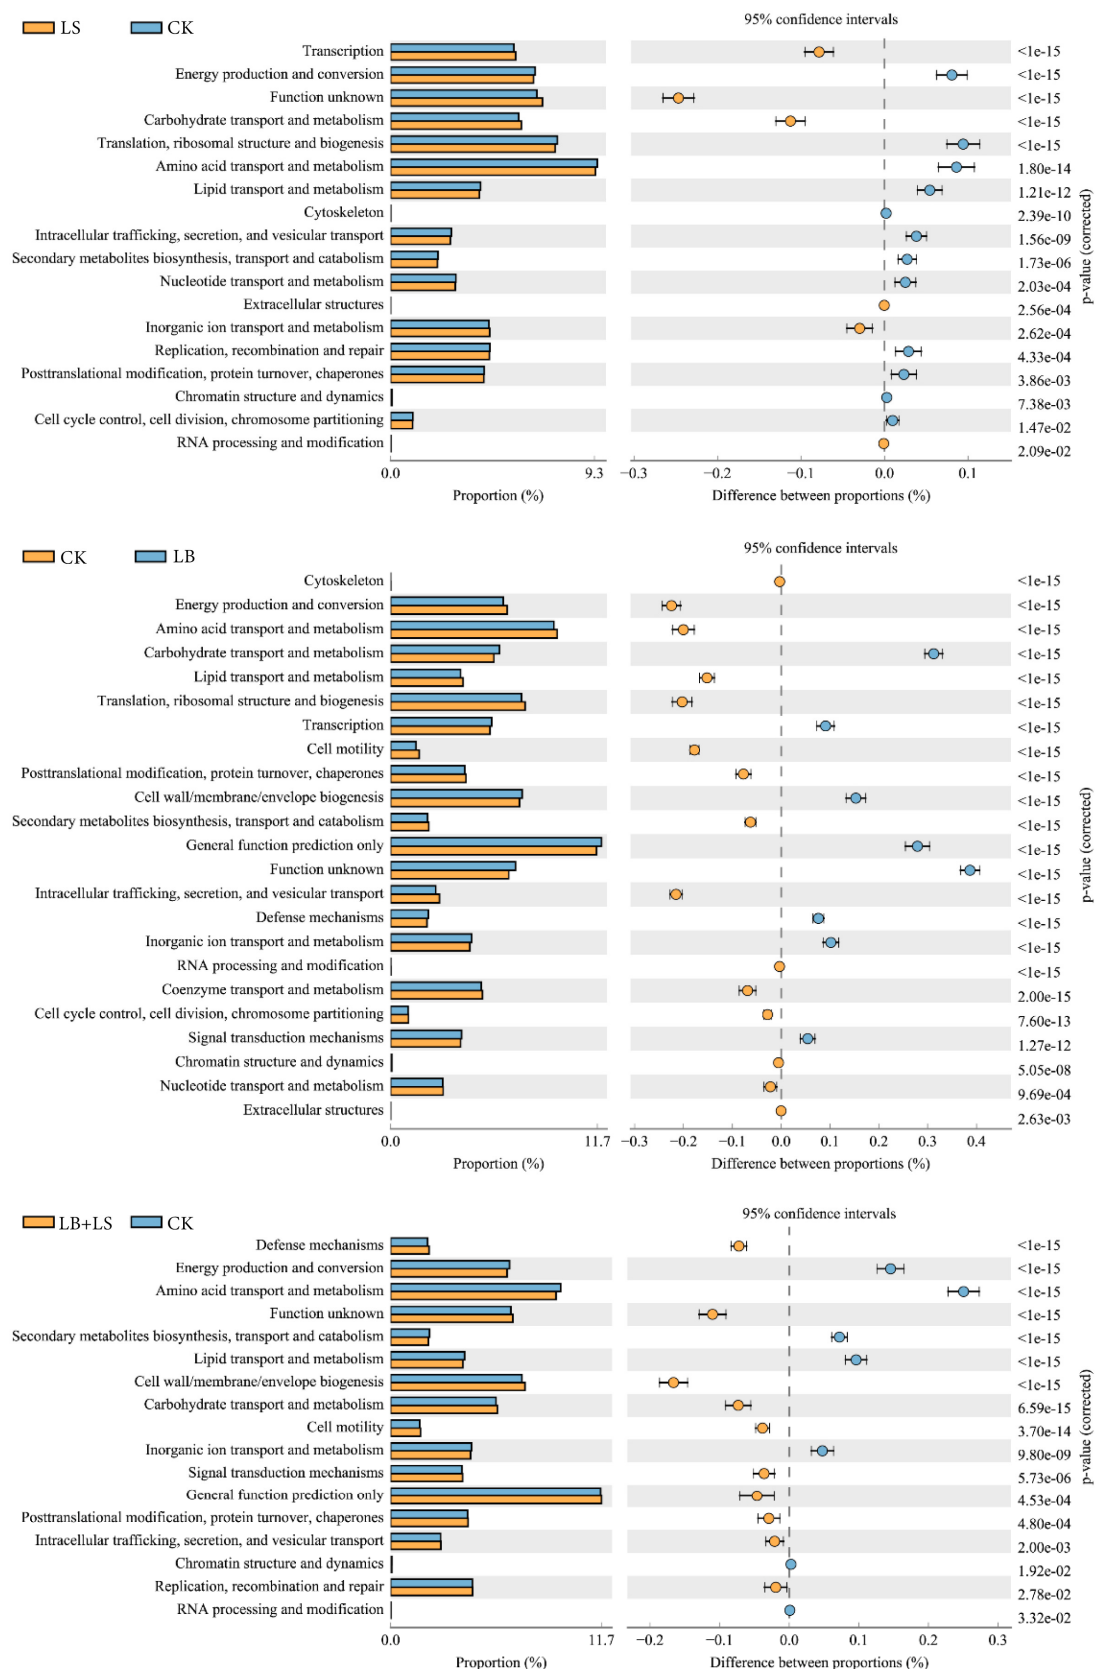

**Figure S6** The COG functional classification of bacterial communities as predicted by PICRUSt.

**Table S1** Metabolites' classification of the *R. palmatum* metablome.

**Table S2** DEMs identified in the widely targeted metabolomics of *R. palmatum* metablome.

**Table S3** KEGG pathway classification of the derived *R. palmatum* metablome.

**Table S4** Results for the 16S rRNA gene-based bacterial sequencing.
